# Supplementary material
Source: PubMed Central journal article supplement (PMC2042154)
Supplement: pnas_0706977104_1.pdf [file pnas_0706977104_1.pdf]

**Table 2. Youngest dates available for the sites examined containing YDB markers**

| YDB test sites         | No. of dates | Black mat | Cal. B.P. $\pm$ (1 $\sigma$ ) | <sup>14</sup> C Date | $\pm$ (1 $\sigma$ ) | Source                    |
|------------------------|--------------|-----------|-------------------------------|----------------------|---------------------|---------------------------|
| Blackwater Draw, NM    | 1            | Yes       | 12982                         | 11040                | 500                 | Ref. 1                    |
| Chobot, AB, CAN        | 1            | Yes       | $\approx$ 13000               | Archaeology          | —                   | Ref. 2                    |
| Daisy Cave, CA (F3-I)  | 1            | Yes       | 13090                         | 11180                | 130                 | Ref. 3                    |
| Gainey, MI             | 1            | No        | 12400                         | TL                   | —                   | Ref. 4                    |
| Lake Hind, MB, CAN     | 1            | Yes       | 12755                         | 10610                | 25                  | This study (UCIAMS 29317) |
| Lommel, Belgium        | 1            | Yes       | 12943                         | 10950                | 50                  | Ref. 5                    |
| Morley, AB, CAN        | 1            | Yes       | $\approx$ 13000               | Deglaciation         | —                   | Ref. 6                    |
| Murray Springs, AZ     | 8            | Yes       | 12916                         | 10890                | 50                  | Ref. 1                    |
| Wally's Beach, AB, CAN | 1            | No        | 12966                         | 10980                | 80                  | Ref. 7                    |
| Weighted average       |              |           | 12938                         |                      | 25                  |                           |

In most cases, the sites were independently dated by other researchers, as noted under “Source,” and were calibrated by the authors using IntCal04 (8). Two sites were not previously radiocarbon dated: (i) Morley drumlin is constrained by the end of local deglaciation to  $\approx$ 13 ka; and (ii) the Chobot site is of Clovis age because of an abundance of Clovis artifacts, limiting the site's age, according to Waters and Stafford (9), to a minimum range of  $\approx$ 200 years between 13,125 to 12,925 cal. B.P. The average calibrated age of all sites analyzed is  $12938 \pm .25$  B.P., which agrees closely with the GISP2 date of 12.9 ka (see SI Fig. 6). Seven of the 10 sites exhibit a black mat immediately overlying the YDB layer.

1. Taylor RE, Haynes CV, Stuiver M (1996) *Antiquity* 70:515-525.
2. Ana (2000) *Mammoth Trumpet* 16(1):1-4
3. Erlandson J, Kennett DJ, Ingram BL, Guthrie DA, Morris DP, Tveskov M, West GJ, Walker P (1996) *Radiocarbon* 38:355-373.
4. Simons DB, Shott MJ, Wright HT (1984) *Arch East N Am* 12:266-267.
5. Van Geel B, Coope GR, Vander Hammen T (1989) *Rev Paleont Palyn* 60:25-129.
6. Boyce JI, Eyles N (1991) *Geology* 19:787-790.

7. Kooyman B, Newman ME, Cluney C, Lobb M., Tolman S, McNeil P, Hills LV (2001) *Am Antiq* 66:686-691.
8. Stuiver M, Reimer PJ (1993) *Radiocarbon* 35:215-230.
9. Waters, MR, Stafford TW, Jr (2007) *Science*, V 315:1122-1126.
