# Supplementary material
Source: PubMed Central journal article supplement (PMC2042154)
Supplement: pnas_0706977104_2.pdf [file pnas_0706977104_2.pdf]

**Table 3. Summary of Ir measurements in and around the YDB**

| Interval and site      | Depth, cm | Magnetic Grain Concentration, ppb |           |     |          | Bulk Sediment Concentration, ppb |            |           |      |
|------------------------|-----------|-----------------------------------|-----------|-----|----------|----------------------------------|------------|-----------|------|
|                        |           | UCLA                              | Becquerel | VUB | Budapest | Actlabs                          | UCLA       | Becquerel | VUB  |
| <b>YDB layer</b>       |           |                                   |           |     |          |                                  |            |           |      |
| Gainey                 | 20        | <0.1                              | <2        | —   | —        | <1                               | <0.6       | <0.5 (3)  | —    |
| Murray Springs         | 246-247   | <0.1                              | <11 (2)   | —   | <6       | ≈2.2, <1                         | <0.6       | <0.5 (3)  | —    |
| Blackwater Draw        | 263-272   | —                                 | <6 (2)    | —   | —        | ≈2.2, <0.1 (3)                   | —          | <50       | <0.5 |
| Chobot                 | 12-15     | —                                 | <100      | —   | —        | —                                | —          | —         | —    |
| Morley Drumlin         | 30        | <0.1                              | <100      | —   | —        | —                                | —          | —         | —    |
| Wally's Beach          | 5         | <b>51±8</b>                       | <100      | —   | —        | <1                               | —          | <50       | —    |
| Lake Hind              | 26-30     | —                                 | —         | —   | —        | ≈2.2, ≈3.8                       | ≈0.4, ≈0.7 | —         | —    |
| Lommel                 | 40-44     | ≈0.5                              | —         | —   | <5       | <1 (2)                           | —          | —         | —    |
| Daisy Cave             | 100       | —                                 | —         | —   | —        | <1                               | —          | —         | —    |
| Topper                 | 75-85     | —                                 | <100 (2)  | —   | —        | <1 (4)                           | —          | <50 (3)   | —    |
| <b>Black Mat layer</b> |           |                                   |           |     |          |                                  |            |           |      |
| Murray Springs         | 245       | —                                 | —         | —   | —        | —                                | —          | <5        | —    |
| Blackwater Draw        | 252-263   | —                                 | —         | —   | —        | ≈2.0, <1                         | —          | <5        | <0.5 |
| Lake Hind              | 26        | —                                 | —         | —   | —        | ≈3.0                             | ≈0.6       | —         | —    |
| <b>Carolina Bays</b>   |           |                                   |           |     |          |                                  |            |           |      |
| Blackville Bay         | 0-240     | ≈0.5                              | <100 (2)  | —   | —        | <b>4±2</b> , <0.5 (6)            | —          | <0.5 (4)  | —    |
| Bladen Bay-B14         | 20-100    | —                                 | <100      | —   | —        | —                                | —          | <100 (2)  | —    |
| Myrtle Bay-M33         | 0-700     | —                                 | <5 (3)    | —   | —        | ≈0.5, <0.5 (7)                   | —          | <50 (4)   | —    |
| Howard Bay             | 325-594   | —                                 | —         | —   | —        | —                                | —          | —         | <0.5 |
| <b>Non-YDB layers</b>  |           |                                   |           |     |          |                                  |            |           |      |
| Murray Springs         | 0         | <0.1                              | <5        | —   | —        | —                                | —          | —         | —    |
|                        | 216       | —                                 | —         | —   | —        | —                                | <0.1       | —         | —    |
|                        | 248-262   | —                                 | —         | —   | —        | —                                | <0.1       | <5 (2)    | —    |
| Blackwater Draw        | 140-252   | —                                 | <50       | —   | —        | <0.1 (2)                         | —          | <5 (2)    | —    |
|                        | 283-468   | —                                 | <2        | —   | <6       | <0.1 (4)                         | —          | <5 (2)    | <0.5 |
| Chobot                 | 8         | —                                 | —         | —   | —        | <1                               | —          | —         | —    |
| Lake Hind              | 12-20     | —                                 | —         | —   | —        | <1 (2)                           | —          | —         | —    |
|                        | 32        | —                                 | —         | —   | —        | <1                               | —          | —         | —    |
| Lommel                 | 30        | —                                 | —         | —   | —        | <1                               | —          | —         | —    |
|                        | 48-70     | <7                                | —         | —   | —        | <1 (3)                           | —          | —         | —    |

| Interval and site | Depth, cm | Magnetic Grain Concentration, ppb |      |           |     | Bulk Sediment Concentration, ppb |      |           |     |
|-------------------|-----------|-----------------------------------|------|-----------|-----|----------------------------------|------|-----------|-----|
|                   |           | Actlabs                           | UCLA | Becquerel | VUB | Actlabs                          | UCLA | Becquerel | VUB |
| Daisy Cave        | 56-96     | —                                 | —    | —         | —   | <1 (6)                           | —    | —         | —   |
|                   | 104-108   | —                                 | —    | —         | —   | <1 (2)                           | —    | —         | —   |
| Topper            | 0-40      | —                                 | —    | <26 (2)   | —   | <1                               | —    | <5 (2)    | —   |
|                   | 120-325   | <0.5                              | —    | <27 (7)   | —   | <1 (4)                           | —    | <5 (7)    | —   |

Neutron Activation Analysis (NAA) measurements were performed at Actlabs and Becquerel Laboratories in Canada, and by Andras Simonits at the Budapest Reactor. ICP-MS measurements were performed by S.S. Que Hee at the University of California, Los Angeles (UCLA), and by P. Claeys at Vrije Universiteit Brussel (VUB). If more than one lower limit was measured, the lowest limit is given and the total number of measurements is shown in parentheses. Positive results, indicated in boldface type, were observed only in the YDB magnetic grains (5 of 21 measurements), YDB bulk sediments (6 of 33 measurements), the black mat (3 of 7 measurements), and in Carolina Bay magnetic grains (4 of 19 measurements) and Bay bulk sediments (2 of 25 measurements). The grand total was 20 positive out of 105 measurements. Above and below the YDB, no Ir was observed in 62 measurements of magnetic grains (17 measurements) and sediments (45 measurements). The large variation in Ir concentrations at various sites is attributed to the nugget effect (1), resulting from small sample sizes, and to the fact that many concentrations were near the lower NAA detection limit of 1-2 ppb. All 20 positive Ir measurements were substantially above crustal abundance (0.020 ppb). Uncertainties for positive values are  $\pm 90\%$ , unless otherwise noted.

1. Meisel T, Moser J, Wegscheider W (2001) *Fresenius' J Anal Chem* 370:566-572.
