# Supplementary material
Source: PubMed Central journal article supplement (PMC2042154)
Supplement: pnas_0706977104_3.pdf [file pnas_0706977104_3.pdf]

**Table 4. Summary of YDB markers found at the sites as discussed in this paper**

| Sites                  | Latitude—Longitude   | Magnetic grains, g/kg | Magnetic microspherules, no. per kg | Glass-like carbon, g/kg | Carbon spherules, no. per kg | Charcoal, g/kg | <sup>3</sup> He <i>R/R<sub>air</sub></i> in fullerenes* | Carbon soot, ppm | Black mat | Ir, max. ppb |
|------------------------|----------------------|-----------------------|-------------------------------------|-------------------------|------------------------------|----------------|---------------------------------------------------------|------------------|-----------|--------------|
| Clovis                 |                      |                       |                                     |                         |                              |                |                                                         |                  |           |              |
| With artifacts         |                      |                       |                                     |                         |                              |                |                                                         |                  |           |              |
| Blackwater Draw, NM    | 34.27564N 103.32633W | 2.14                  | 768                                 | 0.03                    | No                           | 0.03           | 3 (max. 11)                                             | No               | Yes       | 24           |
| Chobot, AB, Canada     | 52.99521N 114.71773W | 1.92                  | 578                                 | 0.11                    | 11                           | 0.19           | —                                                       | No               | Yes       | No           |
| Gainey, MI             | 42.93978N 83.72111W  | 3.20                  | 2144                                | 0.08                    | 1232                         | 0.12           | —                                                       | —                | No        | No           |
| Murray Springs, AZ     | 31.57103N 110.17814W | 2.62                  | 109                                 | 0.03                    | No                           | 0.06           | 29 (max. 87)                                            | 21               | Yes       | 2.2          |
| Wally's Beach, AB      | 49.34183N 113.15440W | 7.79                  | 6                                   | —                       | —                            | —              | —                                                       | —                | No        | 51           |
| Topper, SC — T-1       | 33.00554N 81.49001W  | 0.51                  | —                                   | 0.06                    | 257                          | No             | —                                                       | —                | No        | 2.8          |
| Topper, SC — T-2       | 33.00545N 81.49056W  | 1.95                  | 97                                  | 0.07                    | —                            | No             | —                                                       | —                | No        | No           |
| Clovis-age             |                      |                       |                                     |                         |                              |                |                                                         |                  |           |              |
| Daisy Cave, CA         | 34.04207N 120.32009W | Yes                   | Yes                                 | Yes                     | Yes                          | Yes            | 81 (max. 108)                                           | No               | Yes       | No           |
| Lake Hind, MB, Canada  | 49.43970N 100.69783W | 0.28                  | No                                  | 0.22                    | 184                          | Yes            | —                                                       | No               | Yes       | 3.0          |
| Lommel, Belgium        | 51.23580N 5.26403E   | 0.75                  | 16                                  | 0.06                    | No                           | 0.13           | —                                                       | No               | Yes       | 117          |
| Morley drumlin, AB     | 51.14853N 114.93546W | 9.90                  | 1020                                | Yes                     | 16                           | 0.06           | —                                                       | —                | Yes       | No           |
| Carolina Bays          |                      |                       |                                     |                         |                              |                |                                                         |                  |           |              |
| Blackville, SC — T13   | 33.36120N 81.30440W  | 2.8                   | 205                                 | 0.03                    | 803                          | 0.03           | —                                                       | 1969             | No        | 15           |
| Myrtle Beach, SC — M31 | 33.83776N 78.69565W  | 0.86                  | 36                                  | 0.21                    | 492                          | 0.73           | —                                                       | —                | No        | No           |
| Howard Bay, NC — HB    | 34.81417N 78.84753W  | 1.27                  | 22                                  | 0.01                    | 1458                         | 2.12           | —                                                       | —                | No        | 15           |
| Lk Mattamuskeet — LM   | 35.51865N 76.267917W | 16.12                 | —                                   | .007                    | No                           | Yes            | —                                                       | —                | No        | No           |
| Carolina Bays          |                      |                       |                                     |                         |                              |                |                                                         |                  |           |              |
| Myrtle Beach, SC — M33 | No paleosol reached  | 0.45                  | 20                                  | 16.25                   | 142                          | Yes            | 84 (max. 682)                                           | No               | No        | 2.1          |
| Myrtle Beach, SC — M24 | 33.81883N 78.74181W  | —                     | —                                   | Yes                     | Yes                          | Yes            | —                                                       | —                | No        | No           |
| Myrtle Beach, SC — M32 | 33.83118N 78.72379W  | —                     | —                                   | Yes                     | Yes                          | Yes            | —                                                       | —                | No        | No           |
| Salters Lake, NC — B14 | 33.84034N 78.70906W  | —                     | —                                   | Yes                     | 777                          | 0.20           | —                                                       | —                | No        | No           |
| Lumberton, NC — L33    | 34.70992N 78.62043W  | 0.53                  | 42                                  | 0.42                    | Yes                          | Yes            | —                                                       | —                | No        | No           |
| Lumberton, NC — L28    | 34.75566N 79.10870W  | 0.08                  | —                                   | 0.14                    | Yes                          | Yes            | —                                                       | —                | No        | No           |
| Lumberton, NC — L31    | 3477766. N 79.05008W | —                     | —                                   | Yes                     | Yes                          | Yes            | —                                                       | —                | No        | No           |
| Lumberton, NC — L32    | 34.78117N 79.04774W  | —                     | —                                   | Yes                     | Yes                          | Yes            | —                                                       | —                | No        | No           |
| Lumberton, NC —        | 34.79324N 79.01871W  | —                     | —                                   | Yes                     | Yes                          | Yes            | —                                                       | —                | No        | No           |

| Sites                | Latitude—Longitude   | Magnetic grains, g/kg | Magnetic microspherules, no. per kg | Glass-like carbon, g/kg | Carbon spherules, no. per kg | Charcoal, g/kg | <sup>3</sup> He $R/R_{air}$ in fullerenes* | Carbon soot, ppm | Black mat | Ir, max. ppb |
|----------------------|----------------------|-----------------------|-------------------------------------|-------------------------|------------------------------|----------------|--------------------------------------------|------------------|-----------|--------------|
| Moore City, NC — MCI | 35.30104N 78.84753W  | 0.91                  | —                                   | 0.02                    | 152                          | 11.63          | —                                          | —                | No        | No           |
| Sewell, NC — FS3     | 34.95800N 78.70280W  | —                     | —                                   | 0.11                    | 126                          | 0.03           | —                                          | —                | No        | No           |
| Lake Phelps — LP     | 35.78412N 76.434383W | 17.10                 | —                                   | .013                    | No                           | Yes            | —                                          | —                | No        | No           |
| Averages             |                      | 3.40                  | 389                                 | 0.99                    | 489                          | 1.39           | 49 (max 222)                               | 995              |           |              |

\*The first value is the total <sup>3</sup>He (as  $R/R_{air}$ ) released at all temperatures. max. indicates the highest ratio measured for ET He (<sup>3</sup>He as  $R/R_{air}$ ) during step-heating of the fullerenes or acid-resistant residue.
