# Supplementary material
Source: PubMed Central journal article supplement (PMC2042154)
Supplement: pnas_0706977104_4.pdf [file pnas_0706977104_4.pdf]

**Table 5. XRF analysis of magnetic (Mag.) microspherules from the YDB layers at Blackwater Draw, Gainey, and Morley drumlin**

| Site-Sample                      | MgO | Al <sub>2</sub> O <sub>3</sub> | SiO <sub>2</sub> | CaO  | TiO <sub>2</sub> | MnO | FeO  | Ni    |
|----------------------------------|-----|--------------------------------|------------------|------|------------------|-----|------|-------|
| Blackwater Draw-1                | 1.9 | 3.7                            | 5.8              | —    | 13.0             | 1.7 | 73.9 | —     |
| Blackwater Draw-2                | 0.8 | 2.3                            | 3.1              | —    | 53.1             | 3.5 | 37.2 | —     |
| Gainey-1                         | —   | 2.7                            | 5.1              | —    | —                | —   | 92.2 | 0.02  |
| Gainey-2                         | —   | 24.8                           | 55.0             | —    | 2.0              | —   | 18.2 | —     |
| Gainey-3                         | —   | 2.9                            | 4.0              | —    | 68.1             | 0.1 | 24.9 | —     |
| Gainey-4                         | —   | 6.4                            | 40.1             | 21.3 | 25.4             | —   | 6.9  | —     |
| Gainey-5                         | —   | 1.9                            | 3.7              | —    | 29.2             | 1.0 | 64.2 | —     |
| Morley-1                         | —   | 2.7                            | 4.5              | —    | 47.3             | 1.7 | 43.9 | —     |
| Morley-2                         | 1.8 | 3.0                            | 4.6              | —    | 40.3             | —   | 50.3 | —     |
| Morley-3                         | —   | 1.7                            | 1.9              | —    | —                | —   | 84.3 | 12.1* |
| Morley-4                         | —   | 3.4                            | 11.5             | 1.3  | —                | —   | 83.9 | —     |
| Lommel-1                         | —   | —                              | —                | —    | 74               | —   | 16   | —     |
| Lommel-2                         | —   | —                              | —                | —    | 54               | —   | 11   | —     |
| Lommel-3                         | —   | —                              | —                | —    | 74               | —   | 16   | —     |
| Microspherule average            | 0.4 | 5.0                            | 12.7             | 2.1  | 25.3             | 0.7 | 52.7 | 1.1*  |
| Mag. grains average <sup>†</sup> | 1.5 | 4.7                            | 36               | 2.1  | 20.5             | 1.4 | 31   | 0.01  |
| Crustal average (ref. 1)         | 2.5 | 15                             | 67               | 3.6  | 0.6              | 0.1 | 5    | 0.005 |

The YDB microspherules are enriched in titanium and comparable to magnetic grains from the Blackwater Draw, Murray Springs, Topper, and Lommel sites. Microspherules and magnetic grains are very similar to each other in composition, suggesting a similar source. On the other hand, both are very different from average crustal abundances. All values are in percentage of total weight with uncertainties of less than  $\pm 20\%$ .

\*The Morley drumlin microspherules were possibly derived from a broad area of ice-sheet melting and the atypically high-Ni concentration may indicate that this spherule does not date to the YDB.

<sup>†</sup> Average of values from Blackwater Draw, Murray Springs, Topper, and Lommel.

1. Rudnick R, Gao R (2003) Vol 3, *Treatise on Geochemistry*, eds Holland H, Turekian K (Elsevier, Oxford),
